# Supplementary material
Source: publisher site journal article supplement (https://www.dovepress.com/article/533306)
Supplement: Supplementary file 1 [file 533306%20Supplementary%20Material.docx]

**Supplementary**

| Table S1: Instrumental variants (n=15) of labor epidural analgesia | | | | | | | |
| --- | --- | --- | --- | --- | --- | --- | --- |
| SNPs | Effect_allele | Other_allele | Eaf | Beta | Se | Pval | F |
| rs139441007 | T | C | 0.0123 | 0.2323 | 0.0517 | 7.32E-06 | 5.19 |
| rs966498 | T | C | 0.1673 | -0.0702 | 0.0155 | 6.07E-06 | 5.45 |
| rs76264326 | G | A | 0.0137 | 0.2388 | 0.0514 | 3.47E-06 | 6.09 |
| rs149027603 | G | C | 0.0216 | 0.2146 | 0.0410 | 1.72E-07 | 7.73 |
| rs78507448 | A | G | 0.0196 | 0.1897 | 0.0417 | 5.50E-06 | 5.48 |
| rs76499851 | G | A | 0.0658 | 0.1137 | 0.0237 | 1.73E-06 | 6.30 |
| rs2393805 | A | T | 0.1198 | 0.1014 | 0.0178 | 1.36E-08 | 8.61 |
| rs184695056 | T | C | 0.0435 | -0.1456 | 0.0306 | 2.10E-06 | 7.00 |
| rs115165446 | T | G | 0.0251 | -0.1654 | 0.0370 | 8.25E-06 | 5.31 |
| rs117046806 | G | A | 0.0711 | 0.1030 | 0.0233 | 9.85E-06 | 5.56 |
| rs75402832 | A | G | 0.0549 | 0.1397 | 0.0256 | 5.38E-08 | 8.04 |
| rs72481178 | C | T | 0.0380 | 0.1554 | 0.0316 | 8.95E-07 | 6.99 |
| rs4375412 | A | G | 0.2649 | 0.0585 | 0.0132 | 9.24E-06 | 5.28 |
| rs117498036 | G | A | 0.0321 | 0.1457 | 0.0326 | 8.28E-06 | 5.24 |
| rs141460853 | A | G | 0.0125 | 0.2390 | 0.0539 | 9.62E-06 | 5.60 |

Note: GWAS significance, P<1×10−5, R2<0.001 and distance greater than 1000kb

| Table S2: Instrumental variants (n=23) of spinal epidural analgesia in MR analysis | | | | | | | |
| --- | --- | --- | --- | --- | --- | --- | --- |
| SNPs | Effect_allele | Other_allele | Eaf | Beta | Se | Pval | F |
| rs115803945 | T | C | 0.0116 | 0.2517 | 0.0490 | 2.89E-07 | 5.48 |
| rs72936729 | T | C | 0.1083 | 0.0876 | 0.0173 | 4.24E-07 | 5.61 |
| rs79070408 | A | G | 0.0160 | 0.2060 | 0.0415 | 7.17E-07 | 5.05 |
| rs11125130 | G | T | 0.2694 | -0.0547 | 0.0120 | 5.22E-06 | 4.46 |
| rs141356143 | G | A | 0.0301 | 0.1478 | 0.0327 | 6.57E-06 | 4.81 |
| rs72783076 | C | T | 0.0627 | 0.1005 | 0.0223 | 6.58E-06 | 4.49 |
| rs114158414 | T | C | 0.0173 | 0.1873 | 0.0402 | 3.37E-06 | 4.52 |
| rs72664594 | A | C | 0.0775 | 0.0906 | 0.0200 | 6.32E-06 | 4.44 |
| rs141823625 | A | G | 0.0196 | 0.1865 | 0.0401 | 3.36E-06 | 5.07 |
| rs147325029 | T | C | 0.0183 | 0.1863 | 0.0408 | 5.14E-06 | 4.72 |
| rs187890992 | T | C | 0.0119 | 0.2392 | 0.0505 | 2.28E-06 | 5.10 |
| rs7310784 | T | C | 0.0539 | 0.1140 | 0.0237 | 1.53E-06 | 5.01 |
| rs117179567 | T | C | 0.0117 | 0.2278 | 0.0512 | 8.76E-06 | 4.52 |
| rs79093681 | C | T | 0.0625 | 0.0997 | 0.0217 | 4.58E-06 | 4.40 |
| rs73183682 | C | T | 0.0131 | 0.2138 | 0.0464 | 4.28E-06 | 4.46 |
| rs61912216 | A | G | 0.1675 | 0.0671 | 0.0151 | 8.62E-06 | 4.75 |
| rs17100062 | T | C | 0.1123 | 0.0832 | 0.0185 | 6.80E-06 | 5.22 |
| rs141851998 | A | C | 0.0114 | 0.2414 | 0.0529 | 5.30E-06 | 4.97 |
| rs66506808 | G | C | 0.1600 | -0.0653 | 0.0145 | 6.88E-06 | 4.33 |
| rs80026974 | A | G | 0.0732 | -0.0894 | 0.0200 | 8.22E-06 | 4.11 |
| rs143712255 | A | C | 0.0201 | 0.1712 | 0.0385 | 9.09E-06 | 4.37 |
| rs2138181 | T | C | 0.0522 | 0.1064 | 0.0238 | 8.30E-06 | 4.24 |
| rs7339690 | C | T | 0.0272 | 0.1514 | 0.0329 | 4.48E-06 | 4.59 |

Note: GWAS significance, P<1×10−5, R2<0.001 and distance greater than 1000kb

Figure S1. The flowchart of the observational study

Assessed for eligibility (n = 177)

Stratified (n = 146)

Excluded (n = 31)

 Decline to participate (n = 6)

Prepartum depression (n = 5)

Previous diseases of the uterus (n = 7)

History of psychiatric diseases (n = 2)

Intrapartum cesarean section (n = 11)

Treatment group (n = 73)

 Receiving labor epidural analgesia

Control group (n = 73)

 Routine childbirth care

Lost to follow-up (n =0)

Lost to follow-up (n = 0)

Allocation

Follow-up

Included in analysis (n = 73)

Included in analysis (n = 73)

Analysis


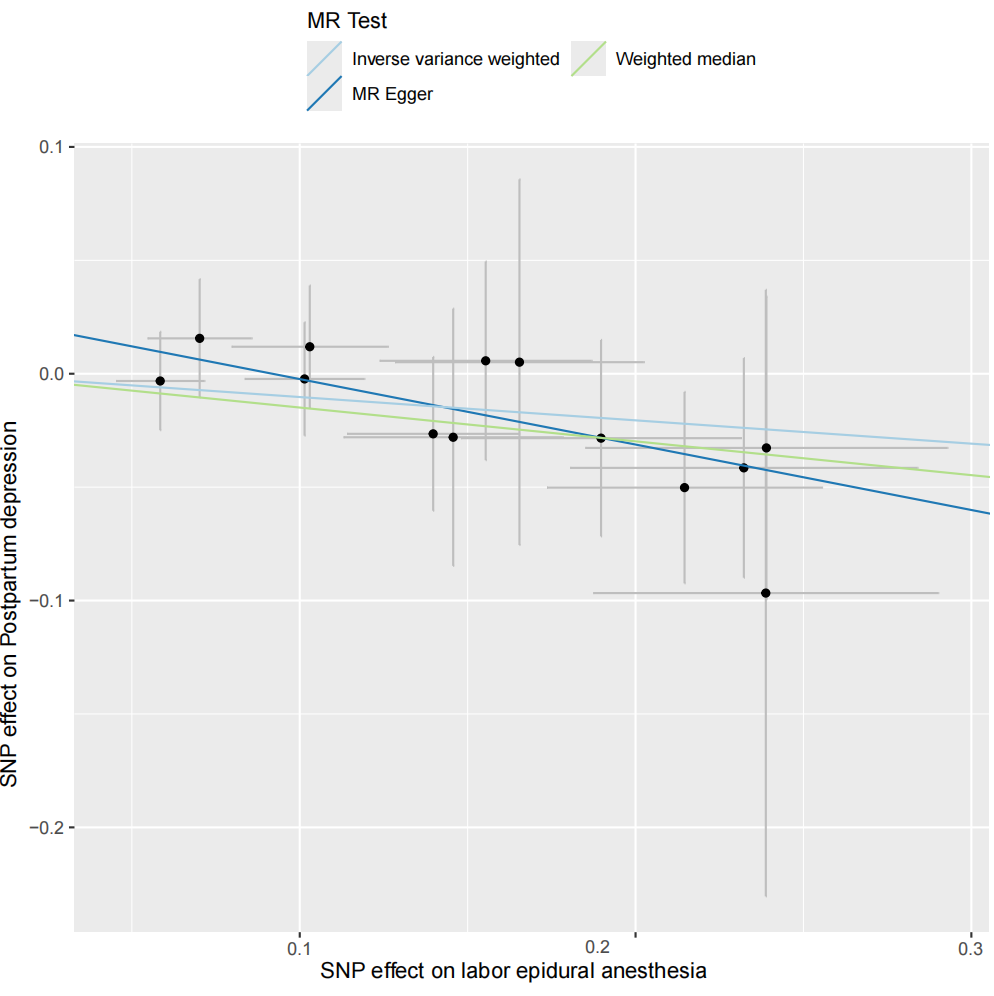


Figure S2. The scatter plot for the association between labor epidural anesthesia and postpartum depression

Note: The plot presents the effect size and confidence intervals for each SNP included in the model on

labor epidural anesthesia (exposure) and postpartum depression (outcome). The slope of the plotted lines represents the Mendelian randomization associations with different methods.


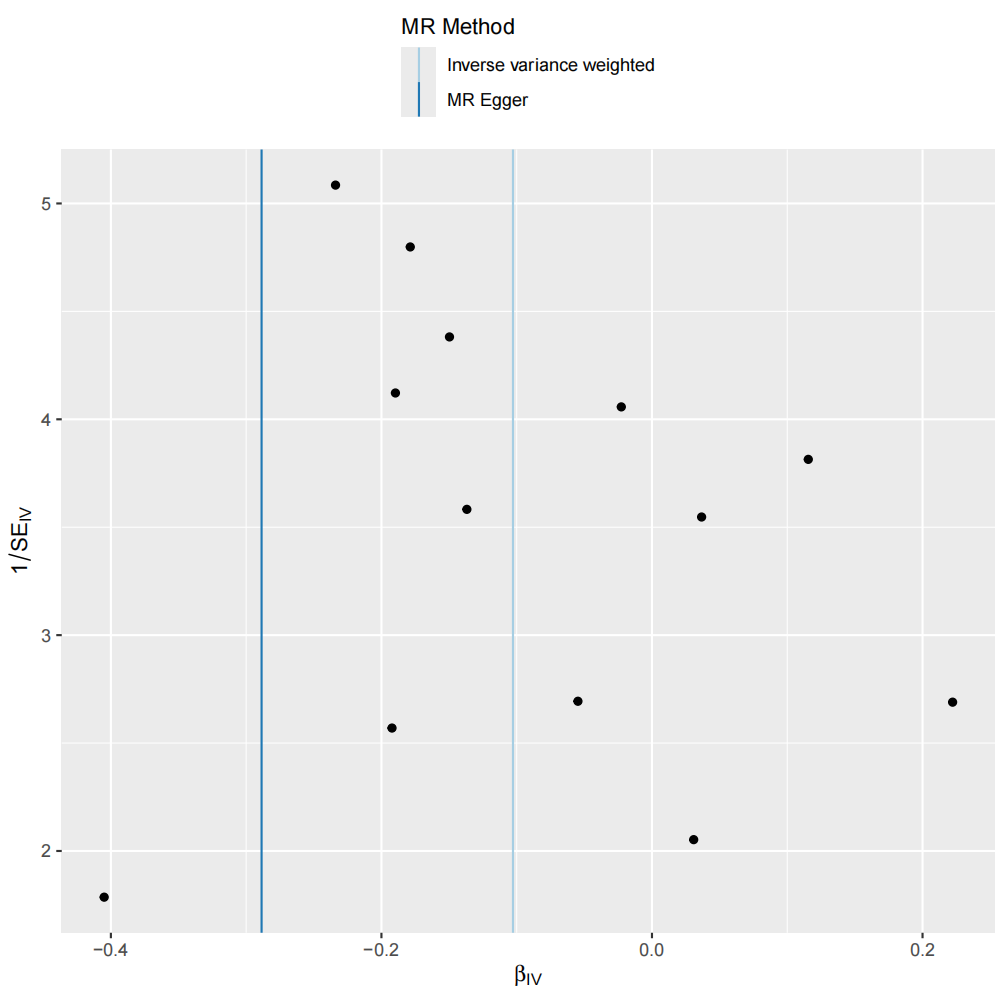


Figure S3. The funnel plot for the association between labor epidural anesthesia and postpartum depression


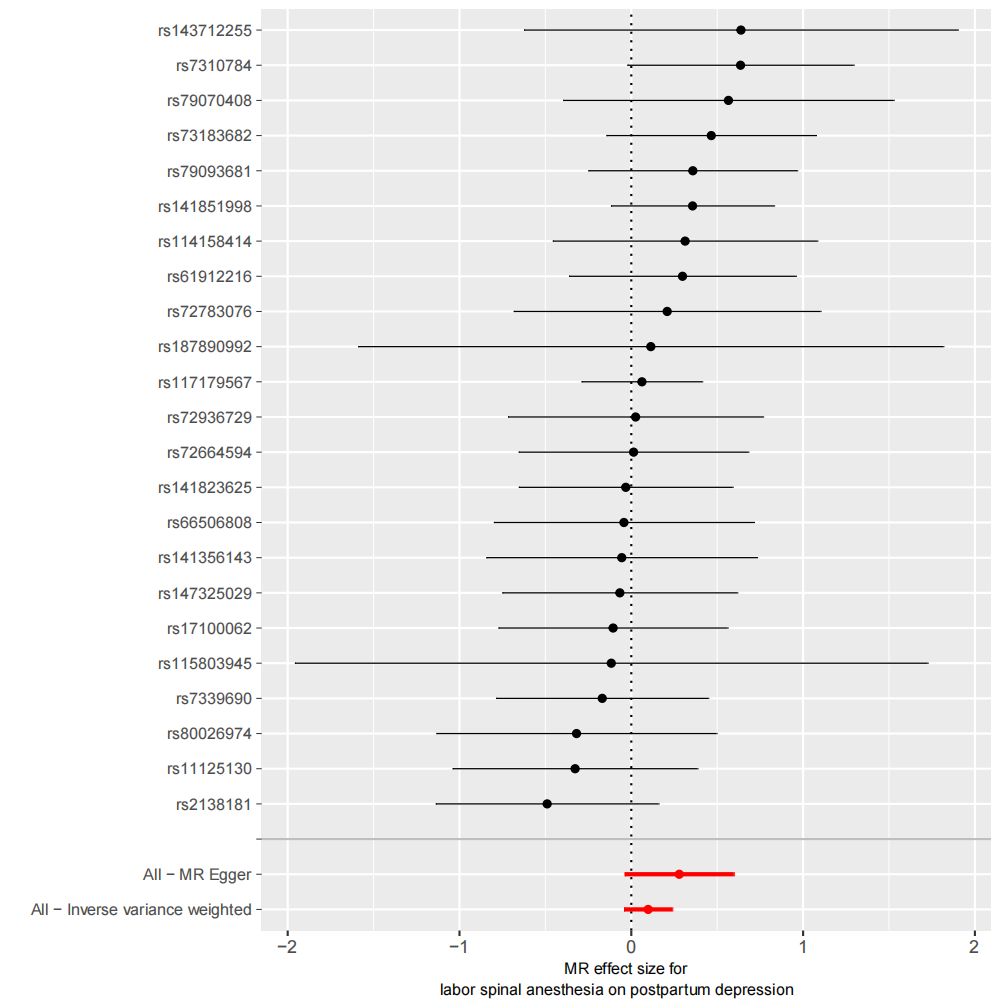


Figure S4. The forest plot for the association between labor spinal anesthesia and postpartum depression


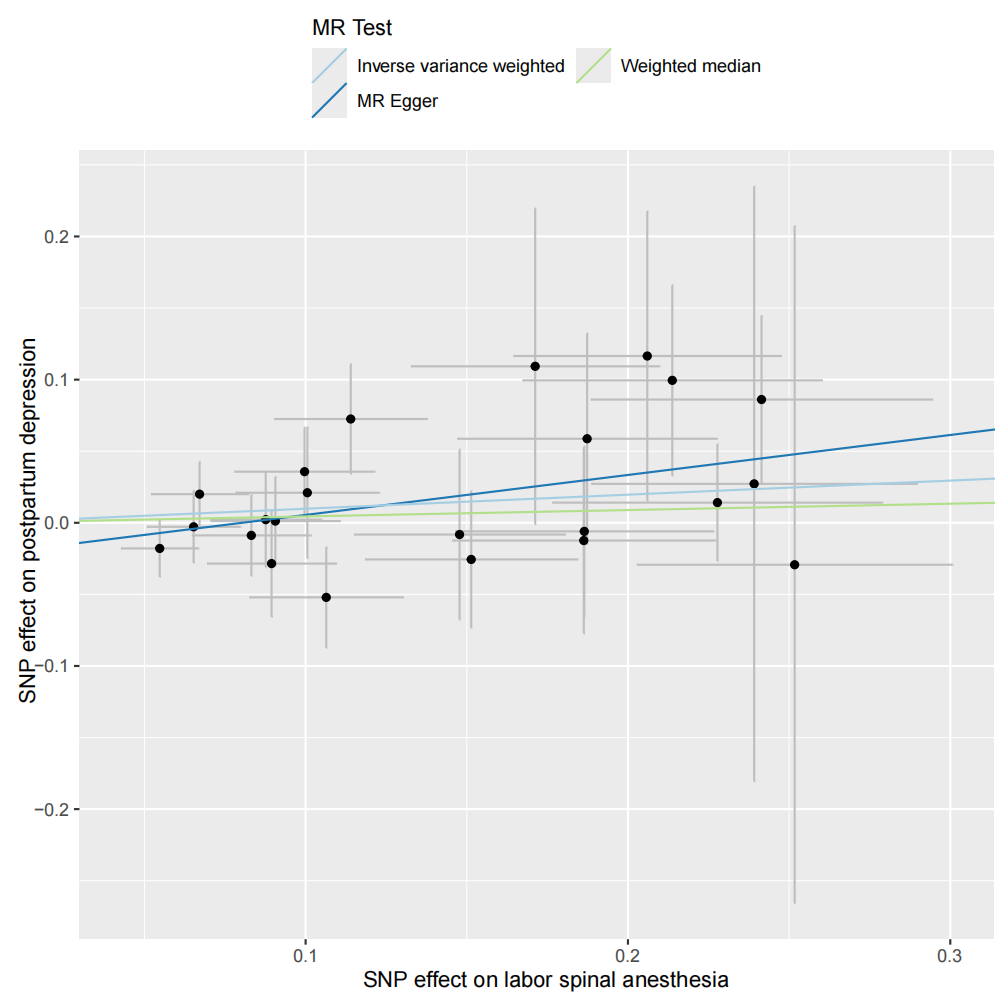


Figure S5. The scatter plot for the association between labor spinal anesthesia and postpartum depression

Note: The plot presents the effect size and confidence intervals for each SNP included in the model on

labor spinal anesthesia (exposure) and postpartum depression (outcome). The slope of the plotted lines represents the Mendelian randomization associations with different methods.


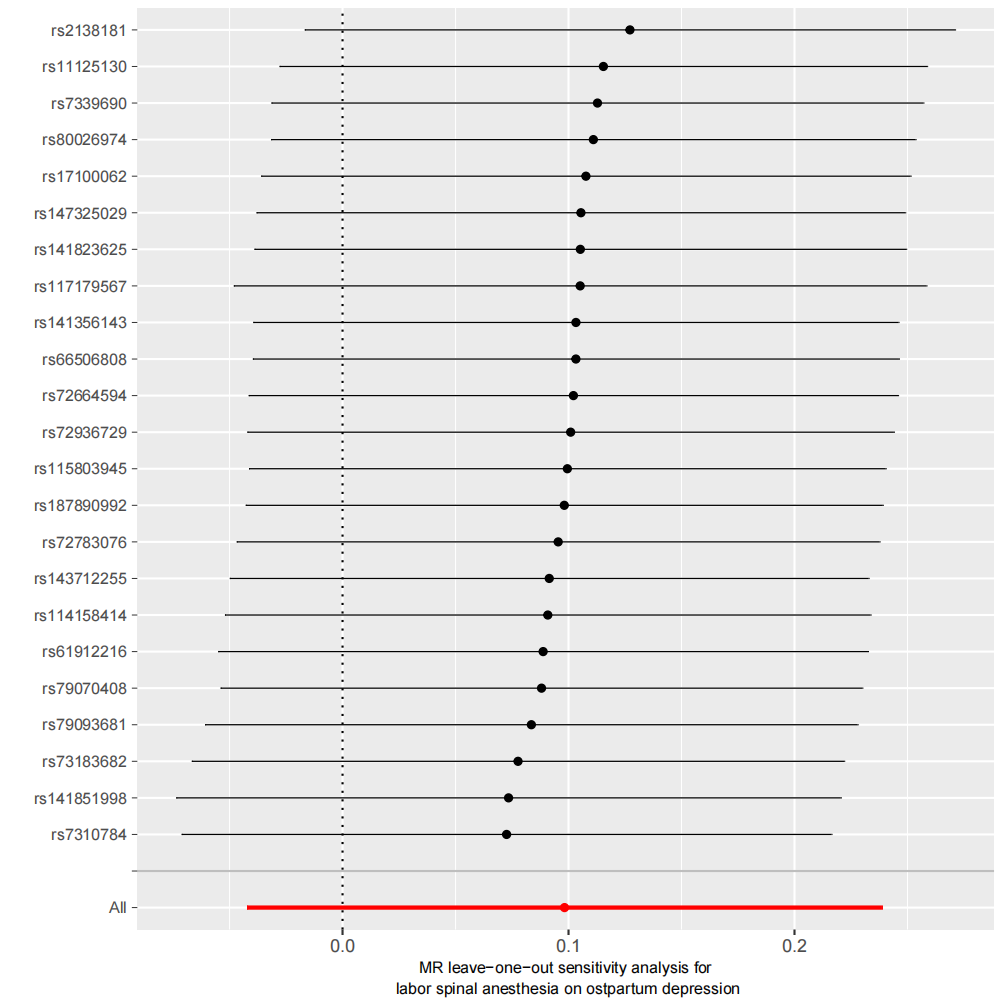


Figure S6. The leave-one-out analysis for the association between labor spinal anesthesia and postpartum depression


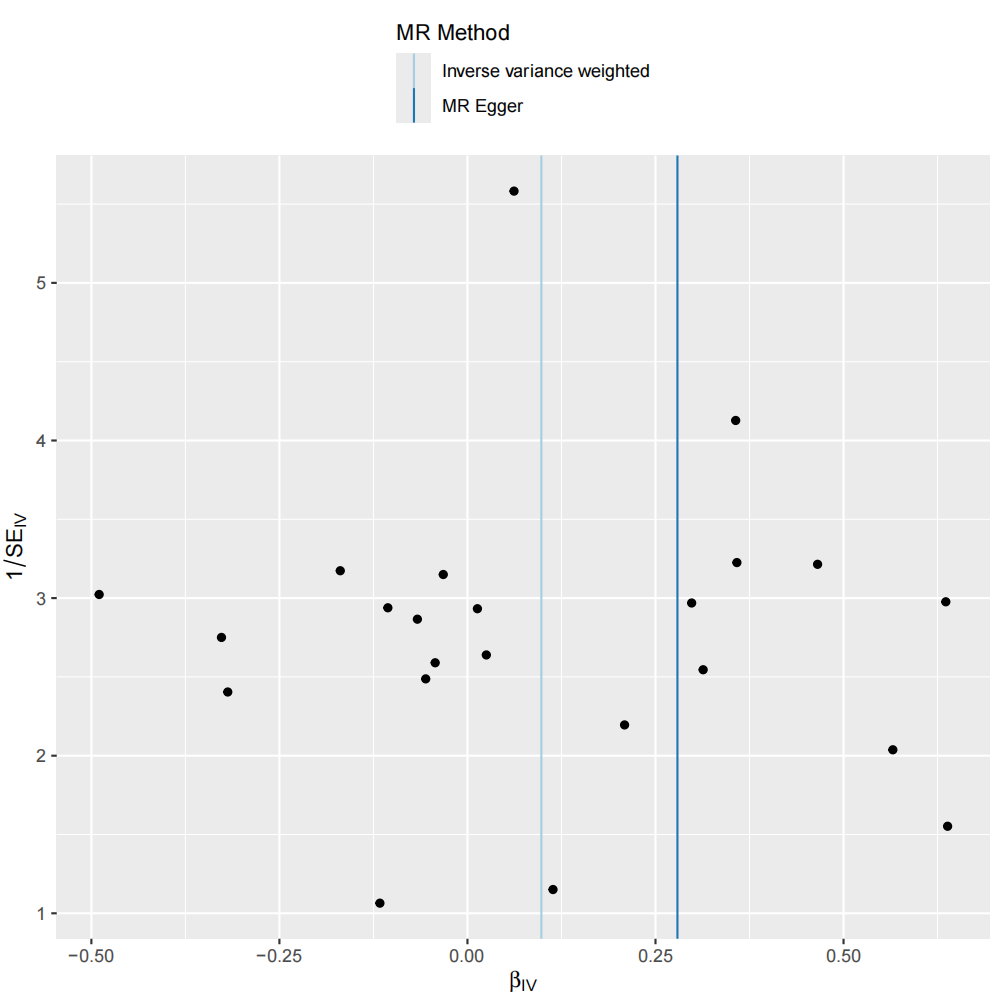


Figure S7. The funnel plot for the association between labor spinal anesthesia and postpartum depression
